# Supplementary material for: Thermal and Catalytic Pyrolysis of Urban Plastic Waste: Modified Mordenite and ZSM-5 Zeolites
Source: MDPI journal article supplement (doi:10.3390/chemistry4020023), 2022-04-07
Supplement: s1 [file s1]

## Supporting Information

# Thermal and catalytic pyrolysis of urban plastic waste: modified mordenite and ZSM-5 zeolites

Taihana Parente Paula<sup>1</sup>, Maria de Fatima Vieira Marques<sup>1\*</sup>, Mônica Regina da Costa Marques<sup>2</sup>, Michelle Souza Oliveira<sup>3</sup> and Sergio Neves Monteiro<sup>3</sup>

<sup>1</sup> Instituto de Macromoléculas Professor Eloisa Mano / Universidade Federal do Rio de Janeiro, Horácio Macedo Av., 2.030, Bloco J, Cidade Universitária, CEP 21941-598 – Rio de Janeiro – RJ – Brazil; taihana.parente@gmail.com; fmarques@ima.ufrj.br.

<sup>2</sup> Institute of Chemistry / State University of Rio de Janeiro, St. São Francisco Xavier, 524, Pavilhão Haroldo Lisboa da Cunha, Maracanã, CEP 20550-0900 - Rio de Janeiro - RJ – Brazil; monicamarquesuerj@gmail.com

<sup>3</sup> Military Institute of Engineering – IME, Department of Materials Science, Praça General Tibúrcio, 80, CEP 22290-270, Urca, Rio de Janeiro, Brazil; oliveirasmichelle@ime.eb.br, snevesmonteiro@gmail.com

\* Correspondence: fmarques@ima.ufrj.br

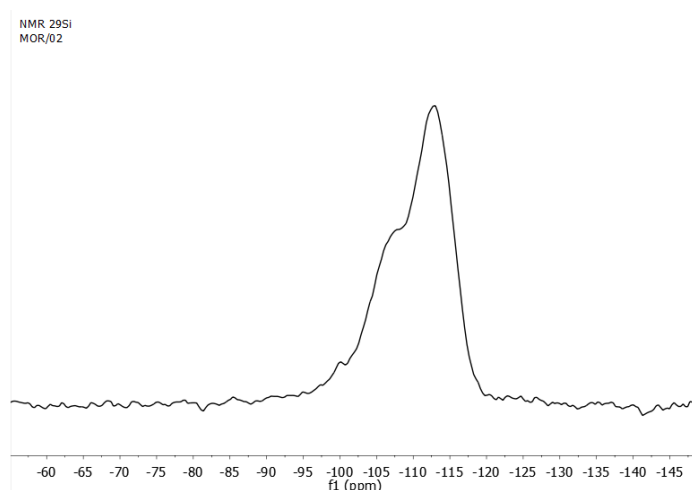

**Figure S1** <sup>29</sup>Si NMR spectrum of **MOR/02**.

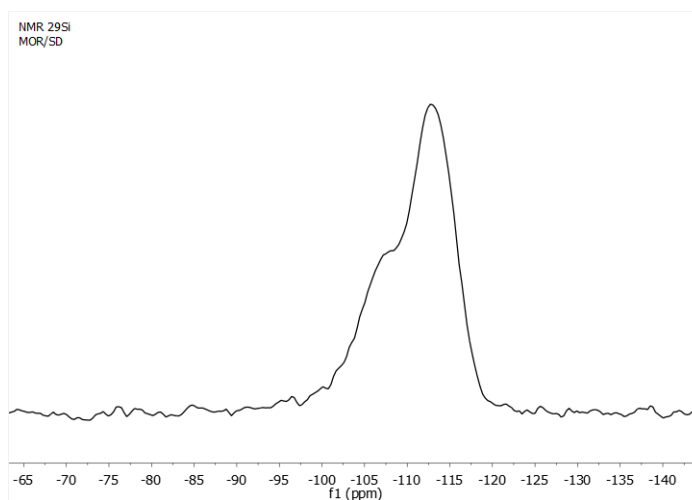

**Figure S2** <sup>29</sup>Si NMR spectrum of **MOR/SD**.

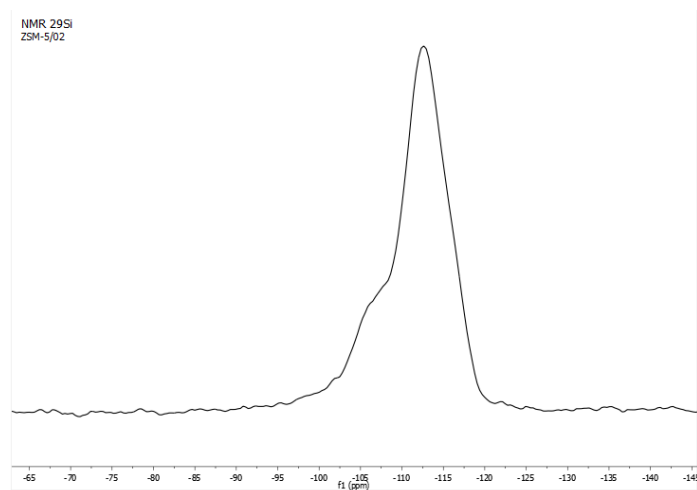

**Figure S3**  $^{29}\text{Si}$  NMR spectrum of **ZSM-5/02**.

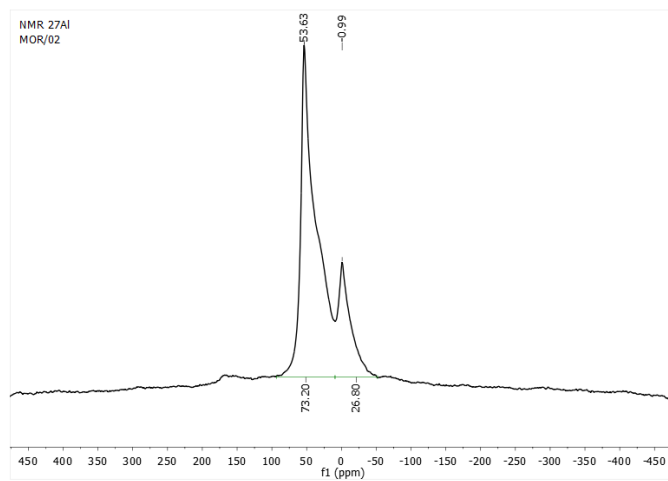

**Figure S4**  $^{27}\text{Al}$  NMR spectrum of **MOR/02**.

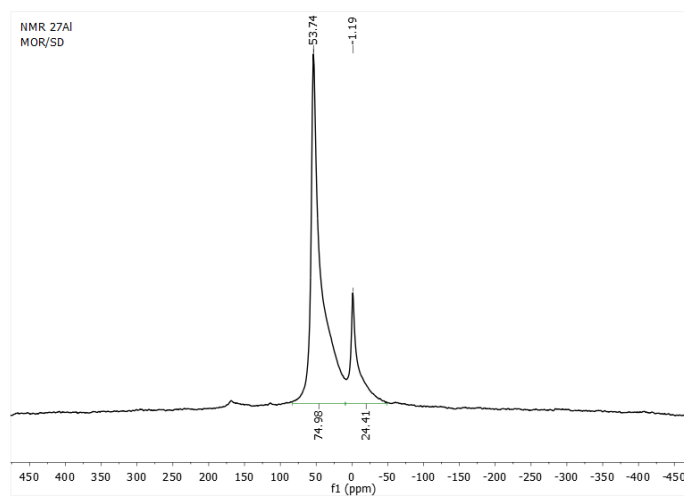

**Figure S5**  $^{27}\text{Al}$  NMR spectrum of **MOR/SD**.

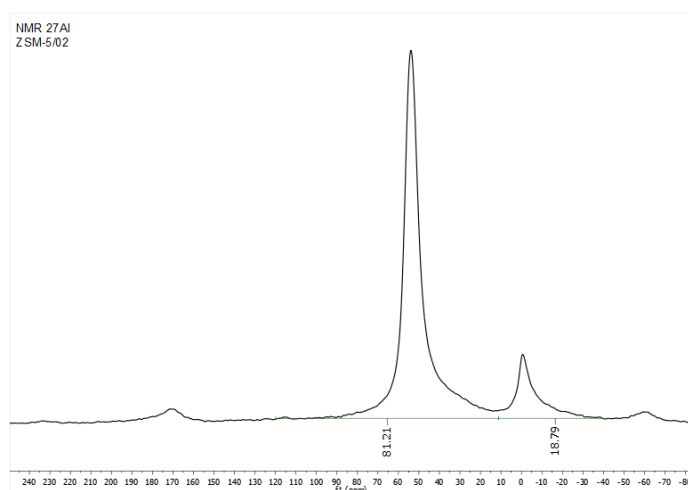

**Figure S6**  $^{27}\text{Al}$  NMR spectrum of **ZSM-5/02**.

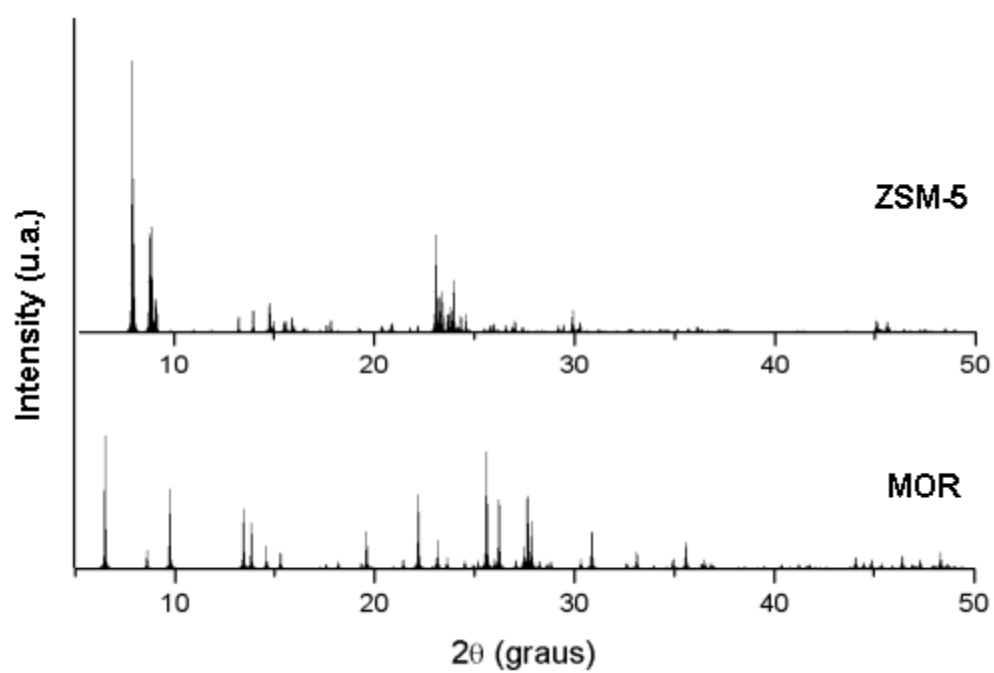

**Figure S7** Diffractogram of zeolites ZSM-5 and MOR. Available in Database of zeolite Structure (CIF files)
